# Supplementary material
Source: Springer Nature journal article supplement (https://www.springermedizin.de/resource/supplementary/13058_2011_2875_MOESM5_ESM.pdf/9702770)

**A** MCF7/Rx2<sup>dox</sup>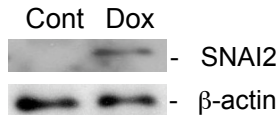**B** C4-2B/Rx2<sup>dox</sup>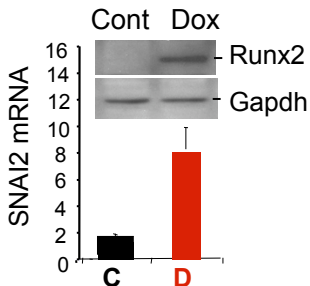**C** T47D/shRx2<sup>dox</sup>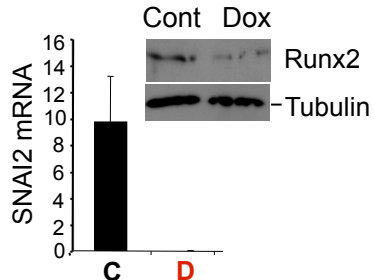**D**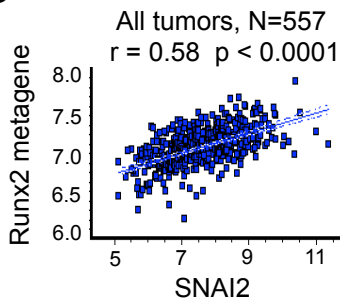

— Linear Regression  
- - - 95% Confidence Interval

**E**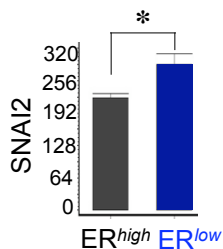**F**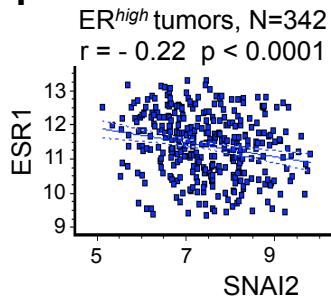

Supplement: MOESM5 [file 9702770]
